# Supplementary material for: Early Holocene ice on the Begguya plateau (Mt. Hunter, Alaska) revealed by ice core 14 C age constraints
Source: Copernicus journal article supplement (doi:10.5194/tc-2023-54), 2023-05-08
Supplement: Supplementary file 1 [file tc-2023-54-supplement.pdf]

## Supplementary

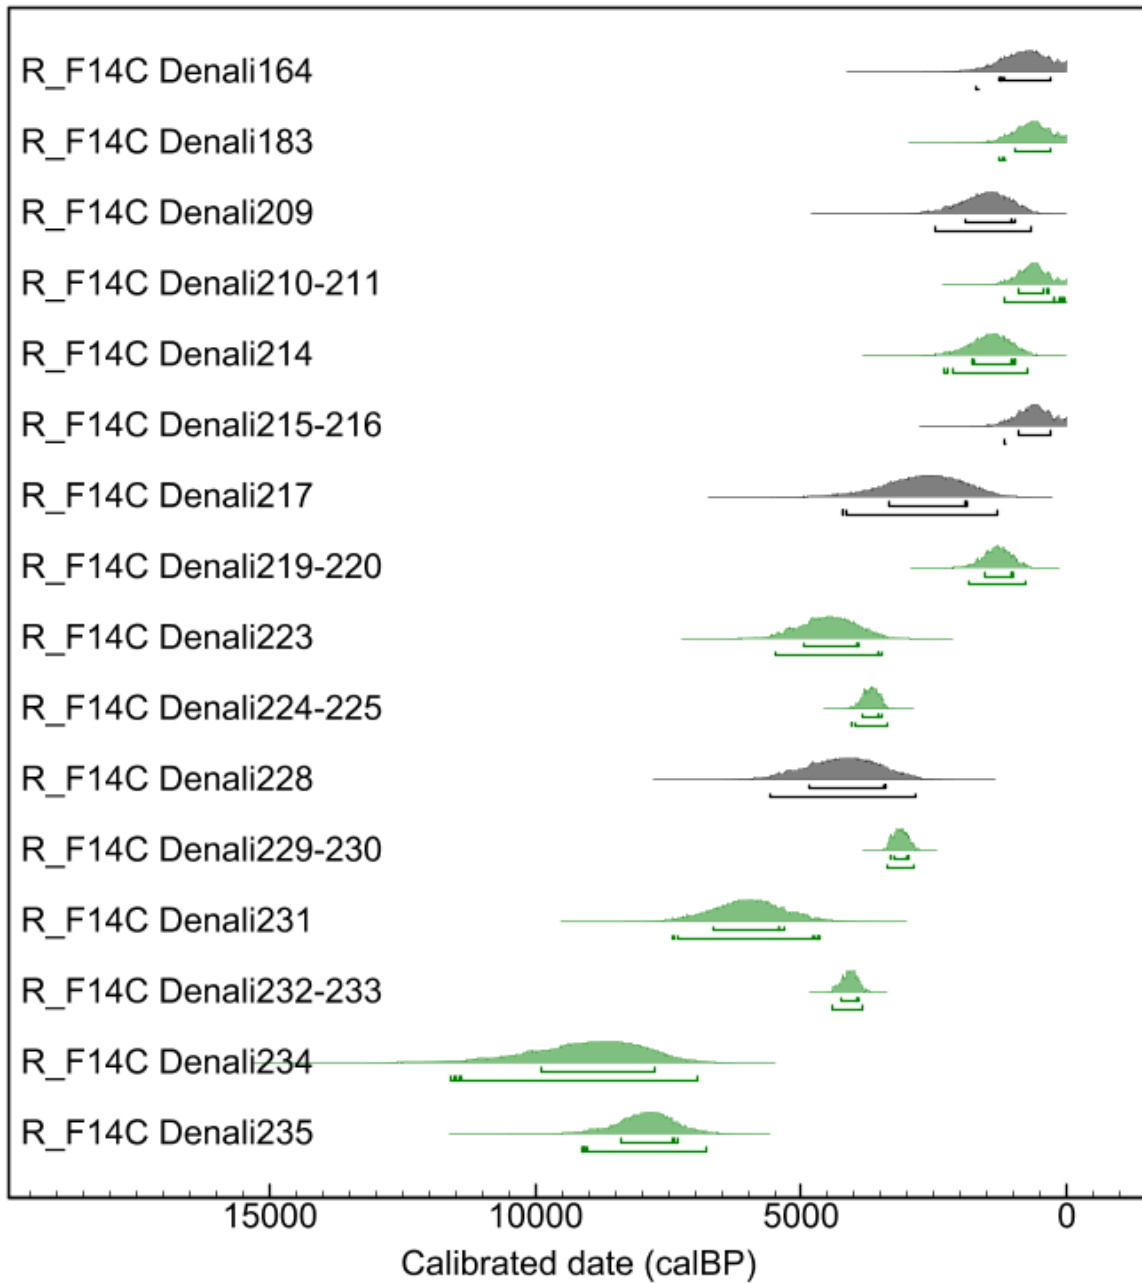

**Figure S1** Calibrated  $^{14}\text{C}$  ages for all Denali ice core samples as derived in OxCal v4.4.4 using the Northern Hemispheric IntCal20 radiocarbon calibration curve (Ramsey 2021; Reimer et al. 2020). Here, without applying the sequence model (no constraint by assuming sequential ordering of samples). Shown are probability distributions of calibrated dates for samples significantly  $>10 \mu\text{g C}$  (green) and  $<10 \mu\text{g C}$  (grey) for AMS analysis.  $1\sigma$  and  $2\sigma$  ranges of the calibrated ages are indicated by the respective lines below.

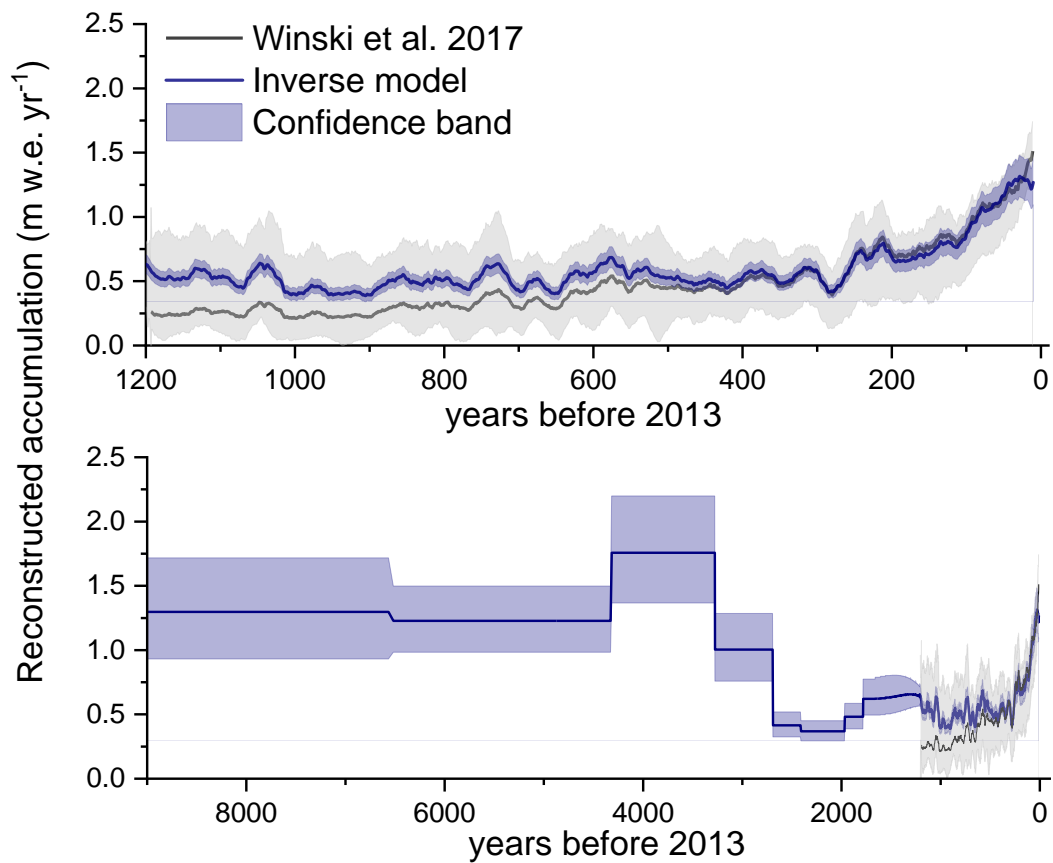

**Figure S2** Upper panel: Reconstructed annual net accumulation rates from the inverse model (navy line and shading) compared with reported values, based on a 3D model, from Winski et al. 2017 (black line and shading). Lower panel: Reconstructed accumulation from this study, extended back in time.

**Table S1**  $^{14}\text{C}$  results of all Denali ice core samples, here with calibrated ages (OxCal v4.4.4, IntCal20) as derived if the sequence model is not applied, and also for samples  $< 10 \mu\text{g C}$  (see main text).

| Sample ID              | AMS Lab ID   | Depth (m)   | Mid Depth (m w.e.) | Carbon amount ( $\mu\text{g C}$ ) | WIOC ( $\mu\text{g kg}^{-1}$ ) | $F^{14}\text{C}$ ( $1\sigma$ ) | Calibrated $^{14}\text{C}$ age (cal BP, $1\sigma$ range) |
|------------------------|--------------|-------------|--------------------|-----------------------------------|--------------------------------|--------------------------------|----------------------------------------------------------|
| Denali164*             | BE-10013.1.1 | 148.6-149.4 | 115.90             | 7.0                               | 6.2                            | $0.910 \pm 0.058$              | 306-1260                                                 |
| Denali183              | BE-10015.1.1 | 165.7-166.6 | 131.40             | 10.8                              | 10.1                           | $0.921 \pm 0.042$              | 299-971                                                  |
| Denali209*             | BE-10016.1.1 | 187.8-188.7 | 151.16             | 9.2                               | 9.8                            | $0.826 \pm 0.044$              | 977-1925                                                 |
| Denali210-211          | BE-8997.1.1  | 188.7-190.3 | 152.29             | 10.8                              | 20.0                           | $0.922 \pm 0.033$              | 327-918                                                  |
| Denali214              | BE-10017.1.1 | 192.1-192.9 | 155.00             | 13.7                              | 11.8                           | $0.831 \pm 0.036$              | 979-1775                                                 |
| Denali215-216*         | BE-8998.1.1  | 193.0-194.7 | 156.17             | 8.8                               | 12.0                           | $0.925 \pm 0.039$              | 305-924                                                  |
| Denali217*             | BE-10018.1.1 | 194.7-195.5 | 157.33             | 6.7                               | 6.1                            | $0.731 \pm 0.054$              | 1890-3351                                                |
| Denali219-220          | BE-8615.1.1  | 196.4-197.3 | 159.31             | 12.0                              | 16.8                           | $0.841 \pm 0.026$              | 1001-1539                                                |
| Denali223              | BE-10019.1.1 | 199.8-200.7 | 161.93             | 21.4                              | 17.3                           | $0.608 \pm 0.029$              | 3922-4966                                                |
| Denali224-225          | BE-11923.1.1 | 200.7-202.3 | 163.06             | 33.9                              | 17.5                           | $0.653 \pm 0.010$              | 3494-3835                                                |
| Denali228*             | BE-10020.1.1 | 203.5-204.2 | 165.11             | 8.7                               | 10.0                           | $0.627 \pm 0.043$              | 3415-4861                                                |
| Denali229-230          | BE-11924.1.1 | 204.2-205.7 | 166.09             | 38.6                              | 20.0                           | $0.691 \pm 0.009$              | 2972-3326                                                |
| Denali231              | BE-10021.1.1 | 205.7-206.6 | 167.18             | 11.3                              | 11.5                           | $0.523 \pm 0.037$              | 5321-6656                                                |
| Denali232-233          | BE-11925.1.1 | 206.6-208.1 | 168.26             | 54.8                              | 30.8                           | $0.629 \pm 0.008$              | 3922-4237                                                |
| Denali234              | BE-10022.1.1 | 208.1-208.8 | 169.23             | 9.8 <sup>&amp;</sup>              | 11.7                           | $0.378 \pm 0.043$              | 7740-9894                                                |
| Denali235 <sup>#</sup> | BE-12465.1.1 | 208.8-209.4 | 169.83             | 20.7                              | 80.3 <sub>DOC</sub>            | $(0.437 \pm 0.025)$            | $(7043-7999)$                                            |
|                        |              |             |                    |                                   |                                | $0.418 \pm 0.027^{\$}$         | $7334-8404^{\$}$                                         |

\*Carbon mass  $< 10 \mu\text{g C}$  (excluded for final dating, see main text).

&Carbon mass not significantly  $< 10 \mu\text{g C}$ .

#Results from the DOC fraction.

<sup>\\$</sup>After correction for in-situ  $^{14}\text{C}$  (Fang et al. 2021; see main text)
